# Supplementary material
Source: publisher figshare collection journal article supplement (https://acs.figshare.com/ndownloader/files/5720058)
Supplement: Supplementary file 1 [file 5720058]

## A New Catalytic Enantioselective Approach to Optically Active Lactones by Addition Reactions to $\alpha$ -Dicarbonyl Compounds

Hélène Audrain and Karl Anker Jørgensen\*

Center for Metal Catalyzed Reactions

Department of Chemistry, Aarhus University

DK-8000 Aarhus C, Denmark

fax: 45 86 19 61 99; e-mail: kaj@kemi.aau.dk

### Supplementary Material:

### Experimental Section

**General Methods.** All reactions were carried out under an atmosphere of  $N_2$  using anhydrous solvents and flame-dried glassware. Solvents were dried according to standard procedures. Purification of the products was carried out by flash-chromatography (FC) using Merck silica gel 60 (230-400 mesh).  $^1H$  and  $^{13}C$  NMR spectra were recorded at 400 and 100 MHz, respectively, using  $CDCl_3$  as the solvent and are reported in ppm downfield from TMS ( $\delta = 0$ ) for  $^1H$  NMR and relative to the central  $CDCl_3$  resonance ( $\delta = 77.00$ ) for  $^{13}C$  NMR. Mass spectra and high resolution mass spectra were obtained on a LC-TOF spectrometer (Micromass). The enantiomeric excess (ee) of the products were determined by chiral GC-MS using a Chrompack Chiralsil-Dex CB column, or by HPLC using a Daicel Chiralpak AD column, a Chiralcel OD column, or Chiralcel OJ and AS columns.

**Materials.** 2,2'-Isopropylidenebis[(4S)-4-tert-butyl-2-oxazoline], (R)-2,2'-isopropylidenebis(4-phenyl-2-oxazoline),  $CuBr_2$ ,  $Cu(OTf)_2$ , and  $AgPF_6$  from Aldrich were stored under an inert atmosphere and used without further purification. Ketene diethylacetal was purchased from Fluka. Ethyl

benzoylformate, methyl pyruvate, 2,3-butanedione, 2,3-pentanedione, 1-phenyl-1,2-propanedione were purchased from Aldrich. 3-Methyl-2-oxo-butyric acid ethyl ester and ethyl bromopyruvate were purchased from Acros Organics. 2-Oxo-butyric acid methyl ester and (*E*)-2-oxo-4-phenylbut-3-enoic acid methyl ester were prepared according to the literature procedure.<sup>1,2</sup>

**General Procedure for the Formation of Optically Active  $\delta$ -Lactones by Reaction of  $\alpha$ -Dicarbonyl Compounds with Ketene Diethylacetal Catalyzed by (*S*)-5a-Cu(OTf)<sub>2</sub>:** Preparation of 4,4,6,6-tetraethoxy-2-phenyl-tetrahydropyran-2-carboxylic acid ethyl ester **3a**: Catalyst (*S*)-5a-Cu(OTf)<sub>2</sub> was prepared by the addition of Cu(OTf)<sub>2</sub> (36 mg, 0.1 mmol) to 2,2'-isopropylidenebis[(4*S*)-4-tert-butyl-2-oxazoline] (30.9 mg, 0.105 mmol) under N<sub>2</sub>. The mixture was dried under vacuum for 1-2 h, then anhydrous Et<sub>2</sub>O (2.0 mL) was added, and the resulting suspension was stirred vigorously for 1-5 h. To the catalyst in solution at -78 °C were added the ethyl benzoylformate **1a** (81  $\mu$ L, 0.5 mmol) followed by 3 equiv. of ketene diethylacetal **2** (190  $\mu$ L, 1.5 mmol), and the reaction was stirred at -78 °C overnight. Purification by FC on silica gel (pentane:EtOAc 45:1 + 0.5% TEA) gave 2 products:

The cyclised compound **3a** (166 mg) isolated in 80% yield and with 93% ee detected by HPLC using a Chiralpak AD column (hexane:*i*-PrOH 99.5:0.5).  $[\alpha]_D^{25} = +12.18^\circ$  (*c* = 0.033 g/mL; CH<sub>2</sub>Cl<sub>2</sub>); <sup>1</sup>H NMR  $\delta$  7.58-7.52 (m, 2H), 7.34-7.20 (m, 3H), 4.07 (dq, 2H, *J* = 7.1, 2.7 Hz), 3.80-3.70 (m, 2H), 3.64 (q, 2H, *J* = 7.1 Hz), 3.60-3.50 (m, 1H), 3.50-3.40 (m, 2H), 3.40-3.29 (m, 1H), 3.14 (d, 1H, *J* = 13.7 Hz), 2.38 (d, 1H, *J* = 14.3 Hz), 2.16 (d, 1H, *J* = 14.3 Hz), 2.05 (d, 1H, *J* = 13.7 Hz), 1.18 (t, 3H, *J* = 7.1 Hz), 1.17 (t, 3H, *J* = 7.1 Hz), 1.13 (t, 3H, *J* = 7.1 Hz), 1.12 (t, 3H, *J* = 7.1 Hz), 1.07 (t, 3H, *J* = 7.1 Hz); <sup>13</sup>C NMR  $\delta$  172.36, 142.38, 128.01, 127.43, 124.99, 113.46, 98.24, 79.28, 60.95, 57.72, 56.98, 55.57, 55.28, 39.27, 38.74, 15.17, 15.14, 15.00, 13.85; mass (TOF ES<sup>+</sup>): *m/z* 433; HRMS calcd for C<sub>22</sub>H<sub>34</sub>O<sub>7</sub>Na 433.2203, found 433.2207.

Compound **6a** was also isolated in 10% yield and with 85% ee detected by HPLC using a Chiralpak AD column (hexane:*i*-PrOH 96:4).  $[\alpha]_{\text{D}}^{25} = +25.45^{\circ}$  ( $c = 0.0055$  g/mL; CH<sub>2</sub>Cl<sub>2</sub>); This compound was identical in all respects (<sup>1</sup>H NMR, <sup>13</sup>C NMR, mass spectra) to that previously reported.<sup>3</sup>

**Preparation of 4,4,6,6-tetraethoxy-2-methyl-tetrahydro-pyran-2-carboxylic acid methyl ester 3b:** Prepared according to the general procedure using methyl pyruvate **1b** (51 mg, 0.5 mmol) to provide **3b** in 74% yield (123 mg, 0.37 mmol).  $[\alpha]_{\text{D}}^{25} = +14.70^{\circ}$  ( $c = 0.051$  g/mL; CH<sub>2</sub>Cl<sub>2</sub>); <sup>1</sup>H NMR  $\delta$  3.68 (s, 3H), 3.67-3.36 (m, 8H), 2.48 (d, 1H,  $J = 13.7$  Hz), 2.20 (d, 1H,  $J = 14.3$  Hz), 2.07 (d, 1H,  $J = 14.3$  Hz), 1.98 (d, 1H,  $J = 13.7$  Hz), 1.49 (s, 3H), 1.16 (t, 3H,  $J = 7.1$  Hz), 1.15 (t, 3H,  $J = 7.1$  Hz), 1.14 (t, 3H,  $J = 7.1$  Hz), 1.08 (t, 3H,  $J = 7.1$  Hz); <sup>13</sup>C NMR  $\delta$  174.48, 113.17, 98.06, 76.75, 57.39, 56.56, 55.48, 55.43, 51.90, 40.40, 38.30, 27.20, 15.16, 15.03; mass (TOF ES<sup>+</sup>):  $m/z$  357; HRMS calcd for C<sub>16</sub>H<sub>30</sub>O<sub>7</sub>Na 357.1890, found 357.1889.

**Preparation of 4,4,6,6-tetraethoxy-2-ethyl-tetrahydro-pyran-2-carboxylic acid methyl ester 3c:** Prepared according to the general procedure using 2-oxo-butyric acid methyl ester **1c** (58 mg, 0.5 mmol) to provide **3c** in 70% yield (121 mg, 0.35 mmol).  $[\alpha]_{\text{D}}^{25} = +18.52^{\circ}$  ( $c = 0.021$  g/mL; CH<sub>2</sub>Cl<sub>2</sub>); <sup>1</sup>H NMR  $\delta$  3.78-3.65 (m, 2H), 3.64 (s, 3H), 3.59-3.31 (m, 6H), 2.44 (d, 1H,  $J = 13.3$  Hz), 2.20 (d, 1H,  $J = 14.0$  Hz), 2.10 (d, 1H,  $J = 14.1$  Hz), 1.97 (d, 1H,  $J = 13.5$  Hz), 1.87-1.75 (m, 1H), 1.75-1.62 (m, 1H), 1.13 (t, 3H,  $J = 7.1$  Hz), 1.12 (t, 3H,  $J = 7.1$  Hz), 1.11 (t, 3H,  $J = 7.1$  Hz), 1.04 (t, 3H,  $J = 7.1$  Hz), 0.85 (t, 3H,  $J = 7.1$  Hz); <sup>13</sup>C NMR  $\delta$  173.84, 113.22, 98.11, 79.58, 57.24, 56.71, 55.43, 55.34, 51.56, 39.31, 38.45, 33.91, 15.23, 15.07, 14.93, 7.73; mass (TOF ES<sup>+</sup>):  $m/z$  371; HRMS calcd for C<sub>17</sub>H<sub>32</sub>O<sub>7</sub>Na 371.2046, found 371.2049.

**Preparation of 4,4,6,6-tetraethoxy-2-isopropyl-tetrahydro-pyran-2-carboxylic acid ethyl ester 3d:** Prepared according to the general procedure using 3-methyl-2-oxo-butyric acid ethyl ester **1d** (77  $\mu$ L, 0.5 mmol) to provide **3d** in 58% yield (109 mg, 0.29 mmol).  $[\alpha]_D^{25} = +29.27^\circ$  ( $c = 0.0218$  g/mL;  $\text{CH}_2\text{Cl}_2$ );  $^1\text{H}$  NMR  $\delta$  4.22-4.04 (m, 2H), 3.84-3.70 (m, 2H), 3.64-3.53 (m, 2H), 3.53-3.32 (m, 4H), 2.44 (d, 1H,  $J = 13.7$  Hz), 2.25 (d, 1H,  $J = 14.0$  Hz), 2.09 (d, 1H,  $J = 13.8$  Hz), 2.05 (d, 1H,  $J = 13.7$  Hz), 2.06-1.96 (m, 1H), 1.28 (t, 3H,  $J = 7.2$  Hz), 1.17 (t, 3H,  $J = 7.1$  Hz), 1.16 (t, 3H,  $J = 7.1$  Hz), 1.15 (t, 3H,  $J = 7.1$  Hz), 1.08 (t, 3H,  $J = 7.2$  Hz), 0.95 (d, 3H,  $J = 6.6$  Hz), 0.92 (d, 3H,  $J = 7.0$  Hz);  $^{13}\text{C}$  NMR  $\delta$  173.38, 113.03, 98.47, 81.48, 60.39, 57.18, 56.90, 55.42, 55.23, 38.08, 36.91, 36.72, 17.17, 16.43, 15.32, 15.20, 15.16, 14.94, 14.12.

**Preparation of 2-bromomethyl-4,4,6,6-tetraethoxy-tetrahydro-pyran-2-carboxylic acid ethyl ester 3e:** Prepared according to the general procedure using ethyl bromopyruvate **1e** (97.5 mg, 0.5 mmol) to provide **3e** in 55% yield (118 mg, 0.29 mmol).  $[\alpha]_D^{25} = +4.64^\circ$  ( $c = 0.0125$  g/mL;  $\text{CH}_2\text{Cl}_2$ );  $^1\text{H}$  NMR  $\delta$  4.26-4.18 (dq, 2H,  $J = 7.0, 1.95$  Hz), 3.80 (s, 2H), 3.75-3.62 (m, 4H), 3.59-3.38 (m, 4H), 2.35 (d, 1H,  $J = 13.7$  Hz), 2.28 (d, 1H,  $J = 13.7$  Hz), 2.24 (d, 1H,  $J = 14.0$  Hz), 2.08 (d, 1H,  $J = 14.0$  Hz), 1.31 (t, 3H,  $J = 7.1$  Hz), 1.19 (t, 3H,  $J = 7.1$  Hz), 1.17 (t, 3H,  $J = 7.1$  Hz), 1.16 (t, 3H,  $J = 7.1$  Hz), 1.13 (t, 3H,  $J = 7.1$  Hz);  $^{13}\text{C}$  NMR  $\delta$  170.60, 113.38, 98.00, 78.88, 61.56, 57.92, 57.06, 55.85, 55.40, 37.98, 37.79, 37.35, 15.12, 15.07, 14.95, 14.08.

**Preparation of 4,4,6,6-tetraethoxy-2-((E)-styryl)-tetrahydro-pyran-2-carboxylic acid methyl ester 3f:** Prepared according to the general procedure using (E)-2-oxo-4-phenylbut-3-enoic acid methyl ester **1f** (95 mg, 0.5 mmol) to provide **3f** in 80% yield (170 mg, 0.4 mmol) and with 85% ee detected by HPLC using a Chiralpak OD column (hexane:*i*-PrOH 99.5:0.5).  $^1\text{H}$  NMR  $\delta$  7.40-7.20 (m, 5H), 6.78 (d, 1H,  $J = 15.9$  Hz), 6.33 (d, 1H,  $J = 15.9$  Hz), 3.83 (m,

2H), 3.71 (s, 3H), 3.67 (q, 2H,  $J = 7.1$  Hz), 3.56-3.40 (m, 4H), 2.73 (d, 1H,  $J = 13.7$  Hz), 2.33 (d, 1H,  $J = 14.3$  Hz), 2.19 (d, 1H,  $J = 13.8$  Hz), 2.13 (d, 1H,  $J = 13.7$  Hz), 1.21 (t, 3H,  $J = 7.1$  Hz), 1.17 (t, 3H,  $J = 7.1$  Hz), 1.16 (t, 3H,  $J = 7.1$  Hz), 1.12 (t, 3H,  $J = 7.1$  Hz);  $^{13}\text{C}$  NMR  $\delta$  172.50, 136.45, 130.23, 129.62, 128.49, 127.73, 126.64, 113.54, 98.06, 78.92, 57.61, 57.00, 55.62, 55.58, 52.17, 39.99, 38.81, 15.33, 15.12, 15.07; mass (TOF ES<sup>+</sup>):  $m/z$  445.3; HRMS calcd for  $\text{C}_{23}\text{H}_{34}\text{O}_7\text{Na}$  445.2202 found 445.2192.

**Preparation of 1-(4,4,6,6-tetraethoxy-2-methyl-tetrahydro-pyran-2-yl)-ethanone 3g:** Prepared according to the general procedure using 2,3-butanedione **1g** (43 mg, 0.5 mmol) to provide **3g** in 71% yield (113 mg, 0.35 mmol) and with 95% ee detected by GC-MS.  $^1\text{H}$  NMR  $\delta$  3.80-3.34 (m, 8H), 2.54 (d, 1H,  $J = 14.0$  Hz), 2.25 (s, 3H), 2.20 (d, 1H,  $J = 14.0$  Hz), 1.97 (d, 1H,  $J = 14.0$  Hz), 1.73 (d, 1H,  $J = 14.0$  Hz), 1.34 (s, 3H), 1.20 (t, 3H,  $J = 7.0$  Hz), 1.16 (t, 3H,  $J = 7.0$  Hz), 1.15 (t, 3H,  $J = 7.0$  Hz), 1.1 (t, 3H,  $J = 7.0$  Hz);  $^{13}\text{C}$  NMR  $\delta$  211.13, 112.99, 98.30, 81.51, 58.03, 55.89, 55.39, 55.24, 38.34, 36.86, 25.89, 24.69, 15.15, 14.95, 14.61; mass (TOF ES<sup>+</sup>):  $m/z$  341; HRMS calcd for  $\text{C}_{16}\text{H}_{30}\text{O}_6\text{Na}$  341.1940 found 341.1939.

**Preparation of 1-(4,4,6,6-tetraethoxy-2-methyl-tetrahydro-pyran-2-yl)-propan-1-one 3h:** Prepared according to the general procedure using 2,3-pentanedione **1h** (52  $\mu\text{L}$ , 0.5 mmol) to provide **3h** in 70% yield (117 mg, 0.35 mmol) and with 90% ee detected by GC-MS.  $[\alpha]_D^{25} = +3.91^\circ$  ( $c = 0.011$  g/mL;  $\text{CH}_2\text{Cl}_2$ );  $^1\text{H}$  NMR  $\delta$  3.74-3.57 (m, 3H), 3.56-3.34 (m, 5H), 2.80 (dq, 1H,  $J = 18.3, 7.4$  Hz), 2.64 (dq, 1H,  $J = 18.3, 7.0$  Hz), 2.42 (d, 1H,  $J = 14.0$  Hz), 2.12 (d, 1H,  $J = 14.0$  Hz), 2.06 (d, 1H,  $J = 14.0$  Hz), 1.85 (d, 1H,  $J = 13.7$  Hz), 1.35 (s, 3H), 1.19 (t, 3H,  $J = 7.0$  Hz), 1.16 (t, 6H,  $J = 7.0$  Hz), 1.08 (t, 3H,  $J = 7.0$  Hz), 1.02 (t, 3H,  $J = 7.0$  Hz);  $^{13}\text{C}$  NMR  $\delta$  214.15, 113.14, 98.40, 81.80, 57.87, 56.10, 55.41, 55.35, 38.57,

37.63, 29.57, 16.13, 15.17, 15.04, 14.95, 7.81; mass (TOF ES<sup>+</sup>): *m/z* 355; HRMS calcd for C<sub>17</sub>H<sub>32</sub>O<sub>6</sub>Na 355.2097 found 355.2094.

**Preparation of 1-phenyl-1-(4,4,6,6-tetraethoxy-2-methyl-tetrahydro-pyran-2-yl)-methanone 3i:** Prepared according to the general procedure using 1-phenyl-1,2-propanedione **1i** (74 mg, 0.5 mmol) to provide **3i** in 58% yield (109 mg, 0.29 mmol) and with 90% ee detected by HPLC using a Chiralpak AD column (hexane:*i*-PrOH 99.8:0.2). <sup>1</sup>H NMR δ 8.14 (m, 2H), 7.48-7.32 (m, 3H), 3.76-3.64 (m, 2H), 3.54-3.32 (m, 5H), 3.12 (m, 1H), 2.89 (d, 1H, *J* = 14.4 Hz), 2.19 (d, 1H, *J* = 13.7 Hz), 1.91 (d, 1H, *J* = 14.0 Hz), 1.75 (d, 1H, *J* = 14.0 Hz), 1.64 (s, 3H), 1.16 (t, 6H, *J* = 7.0 Hz), 1.10 (t, 3H, *J* = 7.0 Hz), 0.68 (t, 3H, *J* = 7.0 Hz); mass (TOF ES<sup>+</sup>): *m/z* 403; HRMS calcd for C<sub>21</sub>H<sub>32</sub>O<sub>6</sub>Na 403.2097 found 403.2099.

**General procedure for the hydrolysis of the ketal groups: Preparation of 4-ethoxy-2-methyl-6-oxo-3,6-dihydro-2H-pyran-2-carboxylic acid methyl ester 4b:** To compound **3b** (100 mg, 0.3 mmol) in a mixture of 4 mL of CH<sub>2</sub>Cl<sub>2</sub> and 2 mL of pentane at 0 °C was added 2.5 mL of HCOOH. The mixture was then stirred for 3 h at 0 °C. The reaction was quenched by careful addition of a saturated solution of NaHCO<sub>3</sub>, which was followed by an extraction with CH<sub>2</sub>Cl<sub>2</sub>. The organic phase was further washed with a saturated solution of NaHCO<sub>3</sub> (3x), dried over Na<sub>2</sub>SO<sub>4</sub> and concentrated under vacuum. The crude was purified by FC on silica gel (pentane:EtOAc 3:1) to afford 40 mg of compound **4b** (0.19 mmol, 63%) with 83% ee detected by HPLC using a Chiralpak AS column (hexane:*i*-PrOH 90:10). <sup>1</sup>H NMR δ 5.06 (d, 1H, *J* = 1.9 Hz), 3.88 (m, 2H), 3.74 (s, 3H), 2.91 (d, 1H, *J* = 16.8 Hz), 2.64 (dd, 1H, *J* = 17.2, 1.6 Hz), 1.62 (s, 3H), 1.33 (t, 3H, *J* = 7.0 Hz); <sup>13</sup>C NMR δ 172.43, 170.23, 165.78, 90.37, 79.55, 64.92, 53.13, 36.49, 24.77, 13.82; mass (TOF ES<sup>+</sup>): *m/z* 237; HRMS calcd for C<sub>10</sub>H<sub>14</sub>O<sub>5</sub>Na 237.0739 found 237.0736.

**Preparation of 4-ethoxy-2-ethyl-6-oxo-3,6-dihydro-2H-pyran-2-carboxylic acid methyl ester 4c:** Prepared according to the general procedure using compound **3c** (105 mg, 0.3 mmol) to provide **4c** in 72% yield (50 mg, 0.22 mmol) and with 77% ee detected by HPLC using a Chiralpak OD column (hexane:*i*-PrOH 90:10).  $[\alpha]_D^{rt} = +39.14^\circ$  ( $c = 0.007$  g/mL; CH<sub>2</sub>Cl<sub>2</sub>); <sup>1</sup>H NMR  $\delta$  5.09 (d, 1H,  $J = 1.6$  Hz), 3.92 (m, 2H), 3.77 (s, 3H), 2.86 (d, 1H,  $J = 16.8$  Hz), 2.70 (dd, 1H,  $J = 17.2, 1.6$  Hz), 1.97 (m, 2H), 1.37 (t, 3H,  $J = 7.0$  Hz), 1.01 (t, 3H,  $J = 7.4$  Hz); <sup>13</sup>C NMR  $\delta$  172.19, 170.28, 165.97, 90.57, 82.86, 64.92, 52.95, 34.85, 31.31, 13.87, 7.65; mass (TOF ES<sup>+</sup>):  $m/z$  251; HRMS calcd for C<sub>11</sub>H<sub>16</sub>O<sub>5</sub>Na 251.0896 found 251.0894.

**Preparation of 4-ethoxy-2-isopropyl-6-oxo-3,6-dihydro-2H-pyran-2-carboxylic acid ethyl ester 4d:** Prepared according to the general procedure using compound **3d** (109 mg, 0.29 mmol) to provide **4d** in 67% yield (50 mg, 0.19 mmol) and with 80% ee detected by HPLC using a Chiralpak OD column (hexane:*i*-PrOH 95:5).  $[\alpha]_D^{rt} = +61.62^\circ$  ( $c = 0.0076$  g/mL; CH<sub>2</sub>Cl<sub>2</sub>); <sup>1</sup>H NMR  $\delta$  5.07 (d, 1H,  $J = 1.6$  Hz), 4.22 (m, 2H), 3.92 (m, 2H), 2.82 (d, 1H,  $J = 16.8$  Hz), 2.74 (dd, 1H,  $J = 16.8, 1.6$  Hz), 2.18 (m, 1H), 1.37 (t, 3H,  $J = 7.0$  Hz), 1.26 (t, 3H,  $J = 7.4$  Hz), 1.04 (d, 6H,  $J = 6.6$  Hz); <sup>13</sup>C NMR  $\delta$  171.40, 170.72, 166.19, 90.55, 85.21, 64.87, 61.91, 34.74, 32.78, 16.81, 16.62, 14.08, 13.89; mass (TOF ES<sup>+</sup>):  $m/z$  278.9; HRMS calcd for C<sub>13</sub>H<sub>20</sub>O<sub>5</sub>Na 279.1209 found 279.1215.

**Preparation of 2-bromomethyl-4-ethoxy-6-oxo-3,6-dihydro-2H-pyran-2-carboxylic acid ethyl ester 4e:** Prepared according to the general procedure using compound **3e** (102 mg, 0.24 mmol) to provide **4e** in 50% yield (38 mg, 0.12 mmol) and with 53% ee detected by HPLC using a Chiralpak AD column (hexane:*i*-PrOH 96:4).  $[\alpha]_D^{rt} = +21.36^\circ$  ( $c = 0.0041$  g/mL; CH<sub>2</sub>Cl<sub>2</sub>); <sup>1</sup>H NMR  $\delta$  5.11 (s, 1H), 4.28 (q, 2H,  $J = 7.4$  Hz), 3.95 (m, 2H), 3.73 (d, 1H,  $J = 11.3$  Hz), 3.68

(d, 1H,  $J = 10.9$  Hz), 2.95 (s, 2H), 1.38 (t, 3H,  $J = 7.0$  Hz), 1.29 (t, 3H,  $J = 7.0$  Hz);  
 $^{13}\text{C}$  NMR  $\delta$  169.53, 168.76, 164.53, 90.31, 80.82, 65.22, 63.02, 34.38, 33.82, 14.02,  
13.89; mass (TOF ES<sup>+</sup>):  $m/z$  328.8; HRMS calcd for  $\text{C}_{11}\text{H}_{15}\text{BrO}_5\text{Na}$  329.0001  
found 329.0002.

**References:**

1. Weissberger, A.; Kibler, C. J. In *Organics Syntheses*; Horning, E. C., Ed.; John Wiley & Sons: New York, 1955; Collect. Vol. 3, pp 610-613.
2. Audrain, H.; Thorhauge, J.; Hazell, R. G.; Jørgensen, K. A. *J. Org. Chem.* **2000**, *65*, 4487.
3. Moorlag, H.; Kellog, R. *Tetrahedron: Asymmetry*, **1991**, *2*, 705.
